# Supplementary material
Source: Springer Nature journal article supplement (https://www.springermedizin.de/resource/supplementary/13014_2013_1044_MOESM1_ESM.pdf/9635140)
Supplement: MOESM1 [file 9635140]

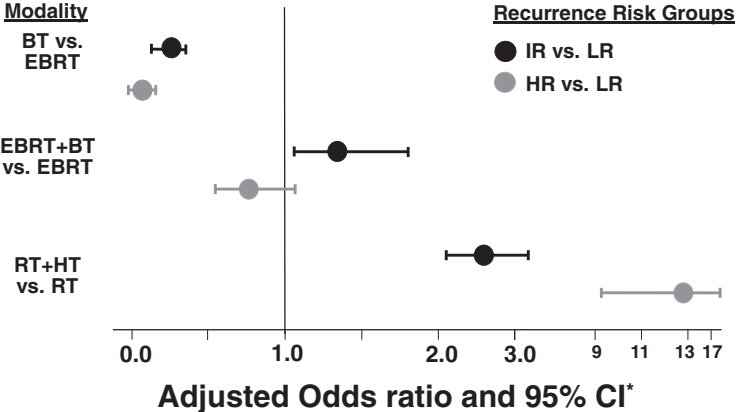

(\*) adjusted for states, age, race-ethnicity, and comorbidity

RT=Radiotherapy; BT=brachytherapy; EBRT=External beam radiotherapy; HT=hormone therapy

LR=low risk group; IR=intermediate risk group; HR=high risk group
